# Supplementary material
Source: PubMed Central journal article supplement (PMC2536524)
Supplement: NIHMS62905-supplement-3File002.pdf [file NIHMS62905-supplement-3File002.pdf]

## **Supporting Information for *Intuitive, Image-Based Cell Sorting Using Opto-fluidic Cell Sorting***

Joseph Kovac and Joel Voldman, Department of Electrical Engineering and Computer Science

77 Massachusetts Avenue, Building 36-824, Cambridge, Massachusetts 02139

### **Contents**

Table S-1: Laser Parameters at Onset of Cell Damage from Literature

Table S-2: Quantification of Device Performance

Figure S-1: Enrichment of Target Cell Population

Video S-1: Levitation and Release of a Single Cell from a Microwell

Video S-2: Levitation and Release of a Single Cell from a Double-loaded Microwell

**Table S-1.** Laser Parameters at Onset of Cell Damage from Literature

| Ref.                  | Cell Type           | $\lambda$<br>(nm) | Power<br>(W) | Exposure<br>Time (s) | Spot<br>Size<br>( $\mu\text{m}$ ) | Power<br>Density<br>( $\text{W}/\text{cm}^2$ ) | Energy<br>Density<br>( $\text{J}/\text{cm}^2$ ) | Energy<br>(J) | Damage                             |
|-----------------------|---------------------|-------------------|--------------|----------------------|-----------------------------------|------------------------------------------------|-------------------------------------------------|---------------|------------------------------------|
| Liang <sup>20</sup>   | CHO                 | 990               | 0.176        | 180                  | 0.70                              | 4.6e+7                                         | 8.2e+9                                          | 31.7          | Clonability                        |
| Liu <sup>22</sup>     | Human<br>Sperm      | 1064              | 0.300        | 120                  | 0.75                              | 6.8e+7                                         | 8.1e+9                                          | 36.0          | Viability<br>(propidium<br>iodide) |
| Mohanty <sup>23</sup> | NC37<br>Lymphoblast | 1064              | 0.120        | 30                   | 0.75                              | 2.7e+7                                         | 8.1e+8                                          | 3.6           | DNA<br>damage                      |
| Wang <sup>24</sup>    | HeLa                | 1070              | 13.2         | 0.004                | 4.9                               | 7.0e+7                                         | 2.8e+5                                          | 0.053         | None                               |
| Our<br>Device         | BA/F3               | 980               | 0.125        | 20                   | 8.6                               | 2.2e+5                                         | 4.3e+6                                          | 2.5           |                                    |

Table S-1 is an adaptation of a supplemental table from Wang *et al.* with some reference to original literature to use more relevant data points for comparison with our experiments. We report our spot size as the spot diameter measured across the beam between points of  $1/e^2$  of maximum spot intensity as measured with an unsaturated CCD. Spot sizes listed for comparison are spot diameters calculated by  $d=1.22\lambda/(n \times NA)$  according to the cited NA and wavelength in the reference. The operating point of Wang *et al.* was reported to induce no damage and is shown for comparison. Our parameters are gentler than the damage threshold reported by Liang, Liu, and Mohanty, especially with respect to power density and energy density.

**Table S-2.** Quantification of Device Performance

| <i>Before Sorting</i>       | Experiment 1            | Experiment 2 | Experiment 3 |
|-----------------------------|-------------------------|--------------|--------------|
| Cell Concentration          | 2.2e6 mL <sup>-1</sup>  | 3.0e6        | 3.0e6        |
| Loading Efficiency          | 32 %                    | 20           | 32           |
| # Total Cells               | 3337 cells              | 2079         | 3294         |
| Target Cell Purity          | 5 %                     | 5            | 6            |
| Target Cell Ratio           | 1/19.0                  | 1/19.2       | 1/14.7       |
| <i>During/After Sorting</i> |                         |              |              |
| # Removals Attempted        | 119                     | 92           | 156          |
| % Removed                   | 66 %                    | 97           | 82           |
| Target Cell Purity          | 81 %                    | 89           | 84           |
| Target Cell Ratio           | 4.1/1                   | 8.1/1        | 5.4/1        |
| % Cells Lost                | 21%                     | 18           | 28           |
| # Cells In Output           | 62 target : 15 unwanted | 73 : 9       | 92 : 17      |
| Enrichment                  | 78.4                    | 155.4        | 79.4         |

Table S-2 quantifies various aspects of device operation. Cell concentration is the concentration of the cell suspension prior to injection. Loading efficiency is the percentage of trap sites containing at least one cell following device loading. Total cell number refers to the total number of cells residing in microwells after loading. Target cell purity is the percentage of target cells comprising the total cell population. Target cell ratio is the ratio of target cells to unwanted cells. Number of removals attempted refers to the number of target cells that we attempted to remove. Percent removed refers to the percentage of target cells successfully removed in all attempted optical removals. Percent of cells lost is the percentage of target cells unaccounted for between release from the array and arrival at the output reservoir. Number of cells in output states the number of target and unwanted cells which arrived at the output reservoir. Enrichment is the target cell ratio after sorting divided by the target cell ratio before sorting. We intentionally did not remove a fraction of target cells from the array in each experiment in order to have reference particles for unperturbed target cells to more easily determine reasonable fluorescence exposures for reservoir analysis images.

**Figure S-1: Enrichment of Target Cell Population**

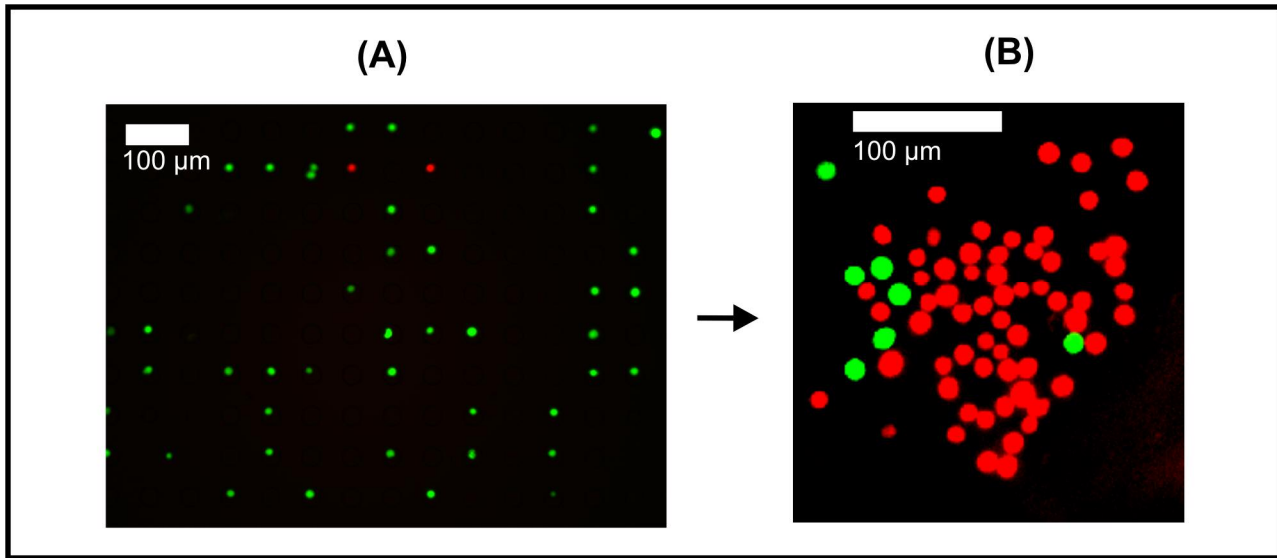

Figure S-1 qualitatively illustrates the enrichment in the 155-fold enrichment case. (A) shows a part of the original cell array with an approximately representative ratio of minority population to majority population cells. (B) is a fluorescence image of part of the bottom of the collection reservoir illustrating part of the sorted population. We used images similar to these to produce the data in Table S-2. Green channel in (A) and red channel in (B) are oversaturated for easier visualization.

**Video S-1.** Levitation and Release of a Single Cell from a Microwell

Video S-1 shows cells initially resting in a section of a microwell array. We focus the laser (which appears as the bright spot on the cell) onto a particular cell soon after the video begins. The cell moves laterally into the beam center and is subsequently levitated into the flow field of the chamber, where drag eventually carries the cell away. This video is available free of charge at <http://pubs.acs.org>.

**Video S-2.** Levitation and Release of a Single Cell from a Double-loaded Microwell

Video S-2 shows cells initially resting in a section of a microwell array. We focus the laser onto a single cell in a doubly-loaded microwell and selectively remove the single cell while leaving behind the untargeted cell. This video is available free of charge at <http://pubs.acs.org>.
